# Supplementary material for: Una referencia conceptual para la disciplina
Source: Atypon-hosted journal article supplement (doi:10.1176/appi.ajp.2015.15070907), 1995-01-01
Supplement: appi.ajp.2015.15070907.ds001.pdf [file appi.ajp.2015.15070907.ds001.pdf]

**Table S1. Prevalence of 12-Month and Lifetime DSM-5 Cannabis Use Disorder among Respondents with Other DSM-5 Psychiatric and Substance Use Disorders**

| Other Disorder                          | 12-Month Cannabis Use Disorder <sup>a</sup> |            |            |            | Lifetime Cannabis Use Disorder <sup>b</sup> |             |            |             |
|-----------------------------------------|---------------------------------------------|------------|------------|------------|---------------------------------------------|-------------|------------|-------------|
|                                         | Any                                         | Mild       | Moderate   | Severe     | Any                                         | Mild        | Moderate   | Severe      |
| Any substance use disorder <sup>c</sup> | 7.4 (0.33)                                  | 3.9 (0.21) | 1.8 (0.16) | 1.8 (0.18) | 13.5 (0.42)                                 | 5.9 (0.26)  | 3.1 (0.22) | 4.4 (0.19)  |
| Alcohol use disorder                    | 10.9 (0.55)                                 | 5.6 (0.36) | 2.7 (0.28) | 2.6 (0.27) | 16.5 (0.53)                                 | 7.0 (0.34)  | 3.9 (0.29) | 5.6 (0.26)  |
| Any drug use disorder <sup>c</sup>      | 22.5 (2.01)                                 | 9.5 (1.59) | 6.1 (1.18) | 6.9 (1.29) | 34.9 (1.46)                                 | 13.5 (1.07) | 7.4 (0.69) | 14.0 (0.82) |
| Nicotine use disorder                   | 8.1 (0.43)                                  | 4.1 (0.28) | 1.9 (0.22) | 2.1 (0.24) | 15.7 (0.54)                                 | 6.6 (0.32)  | 3.7 (0.29) | 5.4 (0.26)  |
| Any mood disorder                       | 7.3 (0.51)                                  | 3.3 (0.29) | 1.6 (0.21) | 2.4 (0.28) | 12.2 (0.52)                                 | 4.6 (0.29)  | 2.8 (0.24) | 4.8 (0.27)  |
| Major depressive disorder               | 6.2 (0.49)                                  | 2.9 (0.31) | 1.6 (0.23) | 1.8 (0.26) | 11.0 (0.56)                                 | 4.4 (0.33)  | 2.5 (0.24) | 4.2 (0.27)  |
| Persistent depression                   | 7.8 (1.11)                                  | 4.3 (0.71) | 1.2 (0.36) | 2.3 (0.55) | 14.5 (0.94)                                 | 4.9 (0.58)  | 3.4 (0.51) | 6.2 (0.60)  |
| Bipolar I                               | 14.6 (1.64)                                 | 5.6 (1.19) | 2.7 (0.67) | 6.2 (1.26) | 22.5 (1.59)                                 | 6.1 (1.10)  | 5.4 (0.95) | 10.9 (1.20) |
| Bipolar II                              | 8.8 (3.52)                                  | 4.9 (2.89) | 2.6 (1.90) | 1.3 (0.95) | 17.9 (4.03)                                 | 6.7 (3.22)  | 4.9 (2.04) | 6.2 (2.34)  |
| Any anxiety disorder                    | 5.4 (0.46)                                  | 2.5 (0.32) | 1.3 (0.17) | 1.6 (0.27) | 12.2 (0.66)                                 | 4.8 (0.41)  | 2.8 (0.33) | 4.6 (0.35)  |
| Panic disorder                          | 8.3 (1.05)                                  | 3.5 (0.82) | 1.6 (0.43) | 3.2 (0.80) | 15.5 (1.13)                                 | 5.8 (0.78)  | 3.5 (0.59) | 6.2 (0.75)  |
| Agoraphobia                             | 6.9 (1.35)                                  | 3.7 (0.92) | 2.1 (0.89) | 1.2 (0.38) | 15.9 (1.66)                                 | 5.4 (1.10)  | 4.6 (1.08) | 5.9 (0.86)  |
| Social phobia                           | 6.3 (0.99)                                  | 2.0 (0.55) | 2.1 (0.52) | 2.2 (0.72) | 15.4 (1.31)                                 | 5.4 (0.87)  | 3.4 (0.62) | 6.6 (0.89)  |
| Specific phobia                         | 4.0 (0.54)                                  | 1.9 (0.36) | 1.2 (0.29) | 1.0 (0.20) | 10.7 (0.81)                                 | 3.5 (0.48)  | 3.2 (0.54) | 4.0 (0.42)  |
| Generalized anxiety disorder            | 7.1 (0.85)                                  | 3.3 (0.59) | 1.5 (0.30) | 2.3 (0.56) | 14.1 (0.85)                                 | 5.4 (0.54)  | 3.2 (0.44) | 5.5 (0.55)  |
| Posttraumatic stress disorder           | 9.4 (0.94)                                  | 2.9 (0.55) | 2.8 (0.59) | 3.7 (0.61) | 17.6 (1.15)                                 | 5.5 (0.68)  | 4.3 (0.58) | 7.8 (0.72)  |
| Any personality disorder                | 8.6 (0.46)                                  | 4.3 (0.31) | 1.9 (0.22) | 2.4 (0.27) | 18.8 (0.77)                                 | 6.8 (0.47)  | 4.2 (0.38) | 7.7 (0.44)  |
| Schizotypal                             | 11.2 (0.75)                                 | 5.3 (0.56) | 2.4 (0.35) | 3.5 (0.47) | 21.2 (1.08)                                 | 6.9 (0.63)  | 5.1 (0.55) | 9.2 (0.75)  |
| Borderline                              | 9.5 (0.56)                                  | 4.6 (0.41) | 2.1 (0.28) | 2.8 (0.33) | 19.6 (0.91)                                 | 6.7 (0.55)  | 4.5 (0.43) | 8.4 (0.53)  |
| Antisocial                              | 11.7 (0.87)                                 | 5.9 (0.68) | 2.6 (0.45) | 3.1 (0.50) | 26.4 (1.16)                                 | 9.3 (0.78)  | 5.7 (0.66) | 11.4 (0.95) |

<sup>a</sup> Prevalence of 12-month cannabis use disorder (any, mild, moderate, severe) among participants with a 12-month diagnosis of the corresponding other psychiatric or substance use disorder

<sup>b</sup> Prevalence of lifetime cannabis use disorder (any, mild, moderate, severe) among participants with a lifetime diagnosis of the corresponding other psychiatric or substance use disorder

<sup>c</sup> Other than cannabis use disorder
